# Supplementary material for: Boosting the Antibacterial Activity of Azithromycin on Multidrug-Resistant Escherichia coli by Efflux Pump Inhibition Coupled with Outer Membrane Permeabilization Induced by Phenylalanine-Arginine β-Naphthylamide
Source: MDPI journal article supplement (doi:10.3390/ijms24108662), 2023-05-12
Supplement: s1 [file s1]

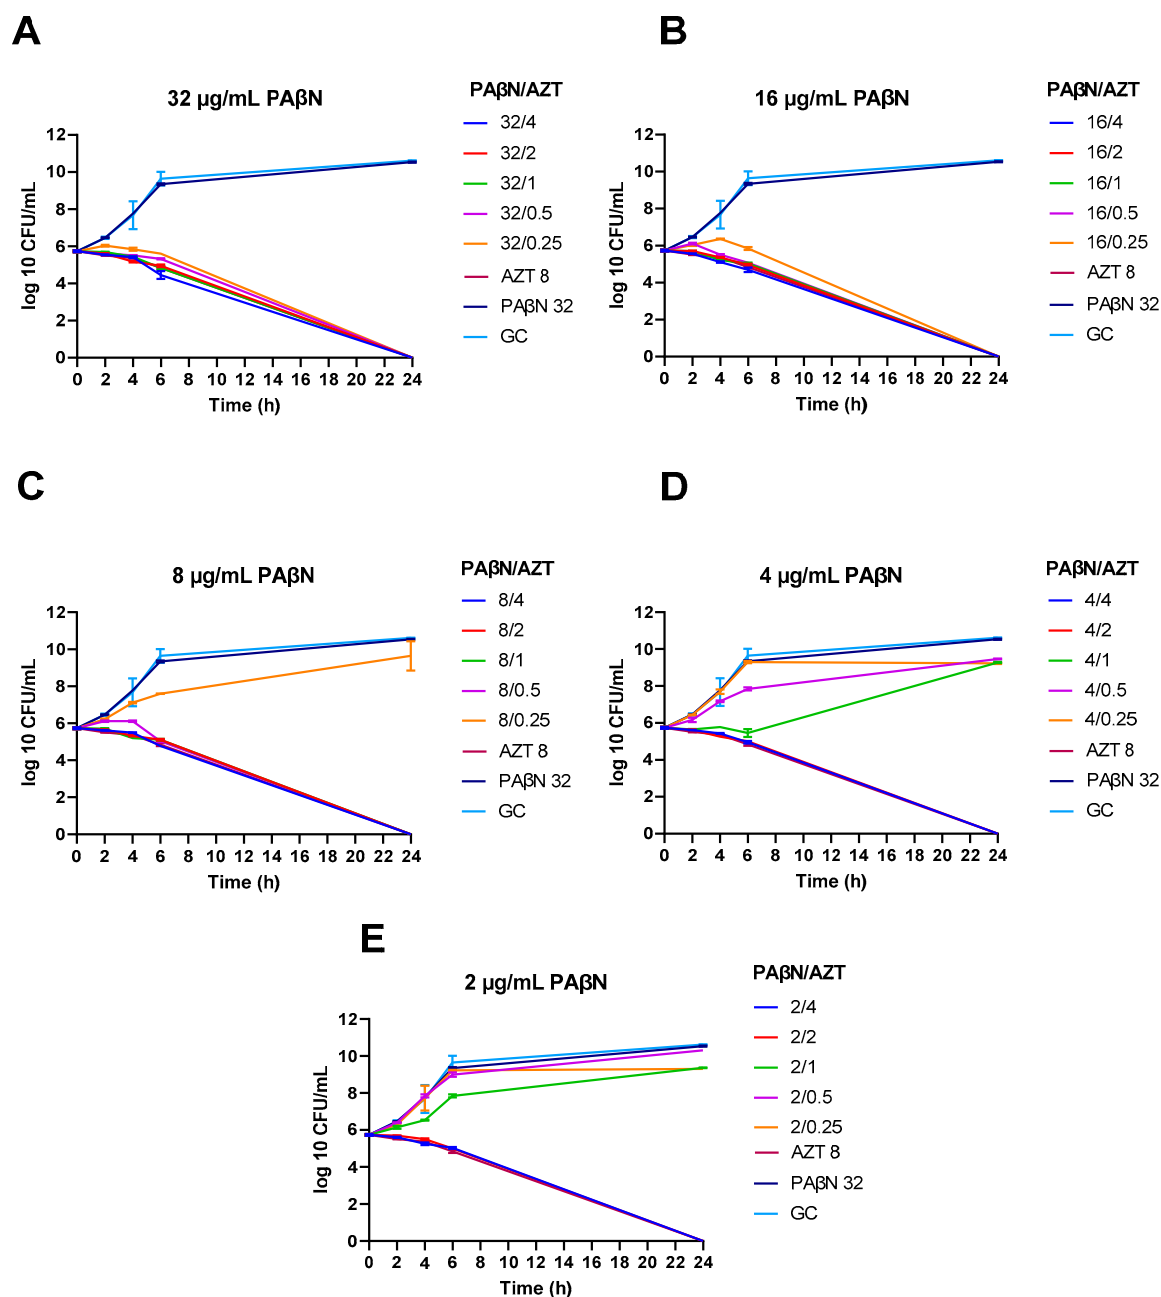

**Figure S1. Synergistic effect of PA $\beta$ N with AZT demonstrated by time-kill graphs for *E. coli* strain EC2.** Different synergistic combinations (A-E) of PA $\beta$ N (2-32  $\mu\text{g/mL}$ ) and AZT (0.25-4  $\mu\text{g/mL}$ ) were tested. PA $\beta$ N (32  $\mu\text{g/mL}$ ) and AZT (8  $\mu\text{g/mL}$ ) were used as controls in addition to an untreated growth control (GC). PA $\beta$ N had no antibacterial activity when used alone, while synergistic combinations with AZT  $\leq \frac{1}{2}$  X MIC killed the bacteria, depending on the concentration of PA $\beta$ N used. Data shown represents the mean value of duplicates from two independent experiments  $\pm$  SD.

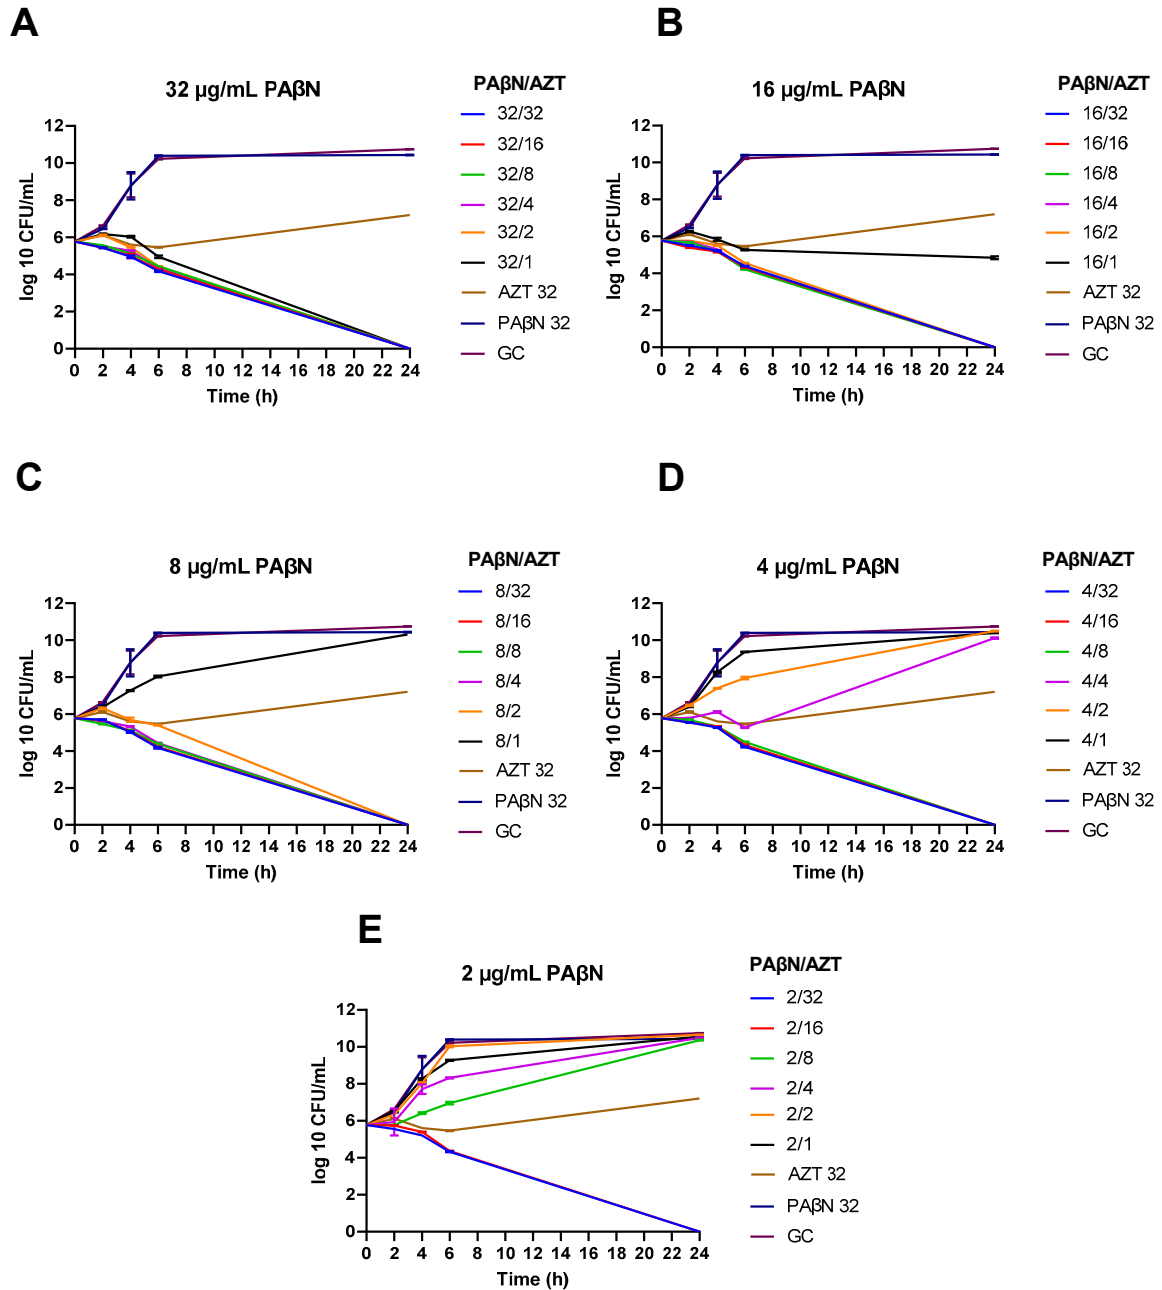

**Figure S2. Synergistic effect of PA $\beta$ N with AZT demonstrated by time-kill graphs for *E. coli* strain EC14.** Different synergistic combinations (A-E) of PA $\beta$ N (2-32  $\mu\text{g/mL}$ ) and AZT (1-32  $\mu\text{g/mL}$ ) were tested. PA $\beta$ N and AZT (32  $\mu\text{g/mL}$ ) were used as controls in addition to an untreated growth control (GC). PA $\beta$ N had no antibacterial activity when used alone, while synergistic combinations with AZT  $\leq \frac{1}{2}$  X MIC killed the bacteria, depending on the concentration of PA $\beta$ N used. Data shown represents the mean value of duplicates from two independent experiments  $\pm$  SD.

**A**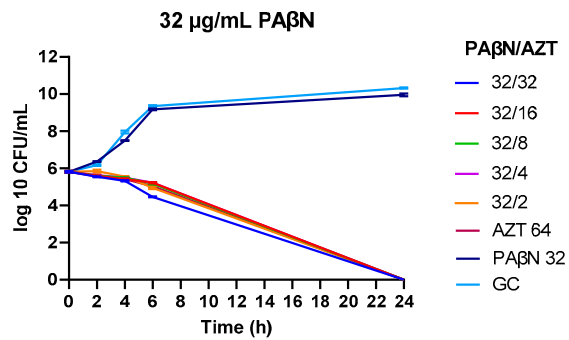**B**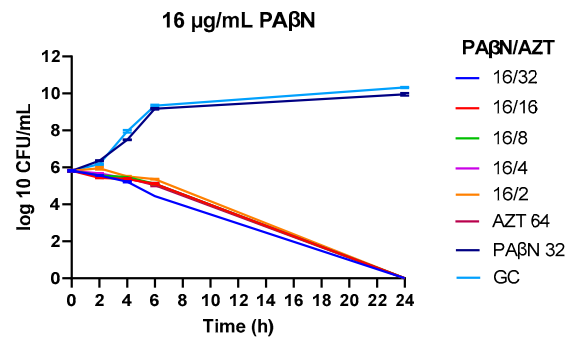**C**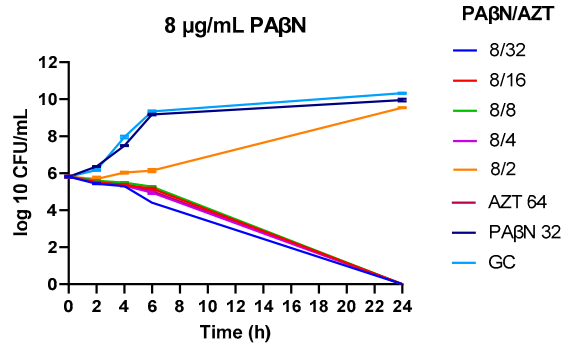**D**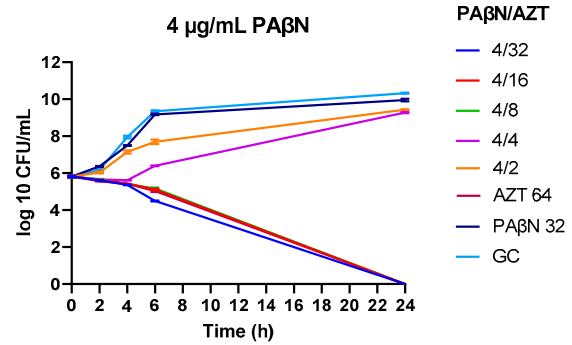**E**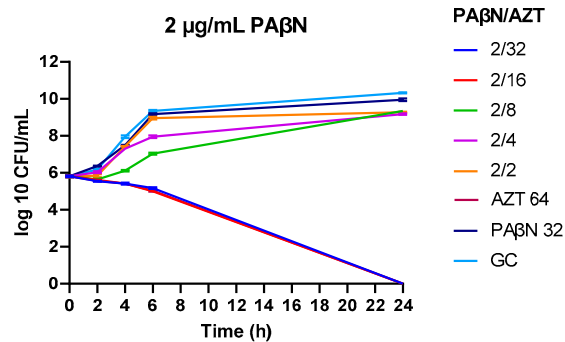

**Figure S3. Synergistic effect of PAβN with AZT demonstrated by time-kill graphs for *E. coli* strain EC477.** Different synergistic combinations (A-E) of PAβN (2-32 µg/mL) and AZT (2-32 µg/mL) were tested. PAβN (32 µg/mL) and AZT (64 µg/mL) were used as controls in addition to an untreated growth control (GC). PAβN had no antibacterial activity when used alone, while synergistic combinations with AZT  $\leq \frac{1}{4}$  X MIC killed the bacteria, depending on the concentration of PAβN used. Data shown represents the mean value of duplicates from two independent experiments  $\pm$  SD.
