# Supplementary material for: Boosting the Antibacterial Activity of Azithromycin on Multidrug-Resistant Escherichia coli by Efflux Pump Inhibition Coupled with Outer Membrane Permeabilization Induced by Phenylalanine-Arginine β-Naphthylamide
Source: Int J Mol Sci. 2023 May 12;24(10):8662. doi: 10.3390/ijms24108662 (PMC10218020; doi:10.3390/ijms24108662)
Supplement: Supplementary file 1 [file ijms-24-08662-s001.zip › Table S1.xlsx]

## Sheet: full data
Table S1. Antibiotic susceptibility data and detected genes in all the strains
Strain ID	Resistance Profile	Disk diffusion														MIC (µg/ml)												Beta-lactamase genes									Macrolide resistance genes						Macrolide efflux pumps				AcrAB-TolC
		AUG	CTX	CPD	CAZ	CPM	AZT	FOX	GM	PTZ	CIP	SXT	ETP	MEM		CAZ	CAZ/AVI	CTX	AZ	GM	AK	CIP	MEM	COL	AZT	PAβN		TEM	SHV	OXA-1	CTX-M	NDM	OXA-48	VIM	KPC	IMP	ereA	ermA	ermB	ermC	mphA	mphB	msrA	msrD	mefA	mefB	acrA	acrB	TolC
EC122	MDR															128	0.5	≥128	≥128	4	8	64	≤0.5	≤0.5	64	≥128		neg	neg	neg	neg	neg	neg	neg	neg	neg	neg	neg	neg	neg	pos	neg	neg	neg	neg	neg	pos	pos	pos
EC123	MDR															8	≤0.25	2	1	2	2	0.25	≤0.5	≤0.5	32	≥128		pos	neg	neg	neg	neg	neg	neg	neg	neg	neg	neg	neg	neg	pos	neg	neg	neg	neg	neg	pos	pos	pos
EC125	XDR															8	≤0.25	≥128	32	128	2	0.25	≤0.5	≤0.5	32	≥128		pos	neg	neg	pos	neg	neg	neg	neg	neg	neg	neg	neg	neg	pos	neg	neg	neg	neg	neg	pos	pos	pos
EC13	MDR															4	≤0.25	≥128	16	16	4	1	≤0.5	≤0.5	32	≥128		neg	neg	pos	pos	neg	neg	neg	neg	neg	neg	neg	neg	neg	pos	neg	neg	neg	neg	neg	pos	pos	pos
EC133	MDR															8	≤0.25	2	2	2	4	16	≤0.5	≤0.5	32	≥128		neg	neg	neg	neg	neg	neg	neg	neg	neg	neg	neg	neg	neg	pos	neg	neg	neg	neg	neg	pos	pos	pos
EC14	MDR															64	0.5	≥128	≥128	32	8	≥64	≤0.5	≤0.5	32	≥128		pos	neg	pos	pos	neg	neg	neg	neg	neg	neg	neg	neg	neg	pos	neg	neg	neg	neg	neg	pos	pos	pos
EC15	MDR															64	≤0.25	≥128	≥128	2	4	0.5	≤0.5	≤0.5	128	≥128		neg	neg	neg	pos	neg	neg	neg	neg	neg	neg	neg	neg	neg	pos	neg	neg	neg	neg	neg	pos	pos	pos
EC163	MDR															32	≤0.25	≥128	128	1	2	0.25	≤0.5	≤0.5	64	≥128		neg	pos	neg	pos	neg	neg	neg	neg	neg	neg	neg	neg	neg	pos	neg	neg	neg	neg	neg	pos	pos	pos
EC26	MDR															64	≤0.25	≥128	≥128	2	4	16	≤0.5	≤0.5	128	≥128		pos	neg	neg	pos	neg	neg	neg	neg	neg	neg	neg	neg	neg	pos	neg	neg	neg	neg	neg	pos	pos	pos
EC261	MDR															128	≤0.25	≥128	128	2	4	0.25	≤0.5	≤0.5	32	≥128		pos	neg	neg	pos	neg	neg	neg	neg	neg	neg	neg	neg	neg	pos	neg	neg	neg	neg	neg	pos	pos	pos
EC325	MDR															16	≤0.25	128	32	2	4	64	≤0.5	≤0.5	64	≥128		pos	neg	neg	pos	neg	neg	neg	neg	neg	neg	neg	neg	neg	pos	neg	neg	neg	neg	neg	pos	pos	pos
EC326	XDR															32	≤0.25	128	32	2	4	64	≤0.5	≤0.5	64	≥128		neg	neg	neg	pos	neg	neg	neg	neg	neg	neg	neg	neg	neg	pos	neg	neg	neg	neg	neg	pos	pos	pos
EC463	MDR															64	≤0.25	32	128	1	4	0.25	≤0.5	≤0.5	32	≥128		pos	pos	neg	neg	neg	neg	neg	neg	neg	neg	neg	neg	neg	pos	neg	neg	neg	neg	neg	pos	pos	pos
EC465	MDR															64	≤0.25	32	32	2	4	0.25	≤0.5	≤0.5	32	≥128		neg	neg	neg	neg	neg	neg	neg	neg	neg	neg	neg	neg	neg	pos	neg	neg	neg	neg	neg	pos	pos	pos
EC54	XDR															≥128	≥128	≥128	≥128	1	2	32	8	≤0.5	32	≥128		neg	neg	neg	pos	pos	neg	neg	neg	neg	neg	neg	neg	neg	pos	neg	neg	neg	neg	neg	pos	pos	pos
EC55	MDR															8	≤0.25	8	2	2	4	0.25	≤0.5	≤0.5	64	≥128		neg	neg	neg	neg	neg	neg	neg	neg	neg	neg	neg	neg	neg	pos	neg	neg	neg	neg	neg	pos	pos	pos
EC56	MDR															16	≤0.25	≥128	64	2	4	32	≤0.5	≤0.5	32	≥128		neg	neg	neg	neg	neg	neg	neg	neg	neg	neg	neg	neg	neg	pos	neg	neg	neg	neg	neg	pos	pos	pos
EC65	XDR															32	0.5	≥128	128	2	4	0.25	≤0.5	≤0.5	32	≥128		pos	neg	neg	neg	neg	neg	neg	neg	neg	neg	neg	neg	neg	pos	neg	neg	neg	neg	neg	pos	pos	pos
EC86	MDR															16	≤0.25	≥128	32	2	4	64	≤0.5	≤0.5	32	≥128		neg	neg	neg	neg	neg	neg	neg	neg	neg	neg	neg	neg	neg	pos	neg	neg	neg	neg	neg	pos	pos	pos
EC92	XDR															64	0.5	≥128	≥128	64	8	≥64	≤0.5	≤0.5	32	≥128		neg	neg	pos	pos	neg	neg	neg	neg	neg	neg	neg	neg	neg	pos	neg	neg	neg	neg	neg	pos	pos	pos
BAA-2469	XDR-CRE															≥128	≥128	≥128	32	≥128	≥128	≥64	≥8	≤0.5	32	≥128		neg	neg	pos	neg	pos	neg	neg	neg	neg	neg	neg	neg	neg	pos	neg	neg	neg	neg	neg	pos	pos	pos
CDC-0346	XDR- colistin R															≥128	1	≥128	≥128	≥128	≥128	16	≤0.5	4	32	≥128		pos	neg	neg	pos	neg	neg	neg	neg	neg	neg	neg	neg	neg	pos	neg	neg	neg	neg	neg	pos	pos	pos
EC499	XDR-CRE															≥128	≥128	≥128	≥128	1	4	64	64	≤0.25	≥128	≥128		neg	neg	neg	neg	pos	neg	neg	neg	neg	neg	neg	neg	neg	pos	neg	neg	neg	neg	neg	pos	pos	pos
EC477	XDR															≥128	8	≥128	≥128	64	4	≥64	≤0.25	≤0.25	64	≥128		neg	neg	pos	pos	neg	neg	neg	neg	neg	neg	neg	neg	neg	pos	neg	neg	neg	neg	neg	pos	pos	pos
EC501	XDR-CRE															≥128	≥128	≥128	≥128	16	2	64	32	≤0.25	32	32		neg	neg	neg	pos	pos	neg	neg	neg	neg	neg	neg	neg	neg	pos	neg	neg	neg	neg	neg	pos	pos	pos
EC162	MDR															32	≤0.25	≥128	128	2	4	2	≤0.5	≤0.5	≥128	≥128		neg	neg	neg	pos	neg	neg	neg	neg	neg	neg	neg	pos	neg	pos	neg	neg	neg	neg	neg	pos	pos	pos
EC405	MDR															128	≤0.25	≥128	≥128	2	2	0.25	≤0.5	≤0.5	≥128	≥128		neg	neg	neg	pos	neg	neg	neg	neg	neg	neg	neg	pos	neg	pos	neg	neg	neg	neg	neg	pos	pos	pos
EC413	MDR															64	≤0.25	≥128	≥128	2	8	≥64	≤0.5	≤0.5	≥128	≥128		pos	neg	pos	pos	neg	neg	neg	neg	neg	neg	neg	pos	neg	pos	neg	neg	neg	neg	neg	pos	pos	pos
EC415	MDR															32	≤0.25	≥128	128	2	4	0.25	≤0.5	≤0.5	≥128	≥128		pos	neg	neg	pos	neg	neg	neg	neg	neg	neg	neg	pos	neg	pos	neg	neg	neg	neg	neg	pos	pos	pos
EC456	XDR															128	≤0.25	32	128	2	2	≥64	≤0.5	≤0.5	≥128	≥128		pos	neg	neg	neg	neg	neg	neg	neg	neg	neg	neg	pos	neg	pos	neg	neg	neg	neg	neg	pos	pos	pos
EC469	MDR															128	≤0.25	≥128	≥128	2	8	32	≤0.5	≤0.5	≥128	≥128		pos	neg	neg	pos	neg	neg	neg	neg	neg	neg	neg	pos	neg	pos	neg	neg	neg	neg	neg	pos	pos	pos
EC500	XDR-CRE															≥128	≥128	≥128	4	≥128	≥128	64	64	≤0.25	≥128	≥128		pos	neg	neg	neg	pos	neg	neg	neg	neg	neg	neg	pos	neg	pos	neg	neg	neg	neg	neg	pos	pos	pos
EC522	XDR-CRE															≥128	≥128	≥128	≤0.25	≥128	≥128	32	16	≤0.25	≥128	≥128		pos	neg	neg	neg	pos	neg	neg	neg	neg	neg	neg	pos	neg	pos	neg	neg	neg	neg	neg	pos	pos	pos
EC520	XDR-CRE															64	≤0.25	32	≥128	2	4	0.5	≤0.25	≤0.25	8	≥128		neg	pos	neg	neg	neg	pos	neg	neg	neg	neg	neg	neg	neg	neg	neg	neg	neg	neg	neg	pos	pos	pos
EC543	MDR-CRE															0.5	≤0.25	2	≤0.25	2	2	64	≤0.25	≤0.25	8	≥128		pos	neg	neg	neg	neg	pos	neg	neg	neg	neg	neg	neg	neg	neg	neg	neg	neg	neg	neg	pos	pos	pos
EC134	MDR															128	0.5	≥128	≥128	2	16	≥64	≤0.5	≤0.5	4	≥128		neg	neg	pos	pos	neg	neg	neg	neg	neg	neg	neg	neg	neg	neg	neg	neg	neg	neg	neg	pos	pos	pos
EC151	MDR															8	≤0.25	≥128	64	32	8	16	≤0.5	≤0.5	4	≥128		neg	neg	pos	pos	neg	neg	neg	neg	neg	neg	neg	neg	neg	neg	neg	neg	neg	neg	neg	pos	pos	pos
EC161	MDR															128	≤0.25	≥128	≥128	4	8	≥64	≤0.5	≤0.5	4	≥128		neg	neg	pos	pos	neg	neg	neg	neg	neg	neg	neg	neg	neg	neg	neg	neg	neg	neg	neg	pos	pos	pos
EC169	MDR															2	≤0.25	≥128	16	2	4	64	≤0.5	≤0.5	4	≥128		pos	neg	neg	pos	neg	neg	neg	neg	neg	neg	neg	neg	neg	neg	neg	neg	neg	neg	neg	pos	pos	pos
EC24	MDR															32	≤0.25	≥128	128	≥128	≥128	0.5	≤0.5	≤0.5	4	≥128		pos	neg	neg	pos	neg	neg	neg	neg	neg	neg	neg	neg	neg	neg	neg	neg	neg	neg	neg	pos	pos	pos
EC256	XDR															32	≤0.25	≥128	64	64	8	64	≤0.5	≤0.5	4	≥128		neg	neg	pos	pos	neg	neg	neg	neg	neg	neg	neg	neg	neg	neg	neg	neg	neg	neg	neg	pos	pos	pos
EC262	MDR															32	≤0.25	≥128	128	1	2	0.5	≤0.5	≤0.5	8	≥128		pos	pos	neg	pos	neg	neg	neg	neg	neg	neg	neg	neg	neg	neg	neg	neg	neg	neg	neg	pos	pos	pos
EC316	MDR															32	≤0.25	≥128	64	64	2	0.25	≤0.5	≤0.5	8	≥128		pos	neg	neg	pos	neg	neg	neg	neg	neg	neg	neg	neg	neg	neg	neg	neg	neg	neg	neg	pos	pos	pos
EC327	MDR															32	≤0.25	≥128	128	2	4	32	≤0.5	≤0.5	4	≥128		neg	neg	neg	pos	neg	neg	neg	neg	neg	neg	neg	neg	neg	neg	neg	neg	neg	neg	neg	pos	pos	pos
EC404	MDR															128	≤0.25	64	≥128	2	8	2	≤0.5	≤0.5	4	≥128		neg	pos	neg	neg	neg	neg	neg	neg	neg	neg	neg	neg	neg	neg	neg	neg	neg	neg	neg	pos	pos	pos
EC414	MDR															64	≤0.25	32	≥128	2	4	2	≤0.5	≤0.5	4	≥128		neg	pos	neg	neg	neg	neg	neg	neg	neg	neg	neg	neg	neg	neg	neg	neg	neg	neg	neg	pos	pos	pos
EC448	MDR															64	≤0.25	≥128	128	2	4	16	≤0.5	≤0.5	2	≥128		neg	neg	neg	pos	neg	neg	neg	neg	neg	neg	neg	neg	neg	neg	neg	neg	neg	neg	neg	pos	pos	pos
EC457	MDR															128	≤0.25	≥128	≥128	64	8	64	≤0.5	≤0.5	8	≥128		neg	neg	pos	pos	neg	neg	neg	neg	neg	neg	neg	neg	neg	neg	neg	neg	neg	neg	neg	pos	pos	pos
EC466	XDR															64	≤0.25	≥128	128	64	4	64	≤0.5	≤0.5	8	≥128		pos	neg	neg	pos	neg	neg	neg	neg	neg	neg	neg	neg	neg	neg	neg	neg	neg	neg	neg	pos	pos	pos
EC468	MDR															4	≤0.25	128	16	2	2	0.5	≤0.5	≤0.5	8	≥128		neg	neg	neg	pos	neg	neg	neg	neg	neg	neg	neg	neg	neg	neg	neg	neg	neg	neg	neg	pos	pos	pos
EC5	MDR															32	≤0.25	≥128	128	2	8	64	≤0.5	≤0.5	4	≥128		pos	neg	neg	pos	neg	neg	neg	neg	neg	neg	neg	neg	neg	neg	neg	neg	neg	neg	neg	pos	pos	pos
EC90	MDR															8	≤0.25	≥128	32	1	2	64	≤0.5	≤0.5	4	≥128		neg	neg	neg	neg	neg	neg	neg	neg	neg	neg	neg	neg	neg	neg	neg	neg	neg	neg	neg	pos	pos	pos
EC1	Sens															0.125	0.125	≤0.0625	0.125	4	4	≤0.0312	≤0.015	0.0625	8	≥128		neg	neg	neg	neg	neg	neg	neg	neg	neg	neg	neg	neg	neg	neg	neg	neg	neg	neg	neg	pos	pos	pos
EC2	Sens															0.125	0.125	≤0.0625	≤0.0625	4	2	≤0.0312	≤0.015	0.0625	8	≥128		neg	neg	neg	neg	neg	neg	neg	neg	neg	neg	neg	neg	neg	neg	neg	neg	neg	neg	neg	pos	pos	pos
EC17	Sens															0.25	0.25	≤0.0625	0.125	2	4	≤0.0312	≤0.015	0.25	8	≥128		neg	neg	neg	neg	neg	neg	neg	neg	neg	neg	neg	neg	neg	neg	neg	neg	neg	neg	neg	pos	pos	pos
ATCC25922	Sens															0.5	≤0.25	≤0.25	≤0.25	1	4	≤0.125	≤0.5	≤0.5	4	≥128		neg	neg	neg	neg	neg	neg	neg	neg	neg	neg	neg	neg	neg	neg	neg	neg	neg	neg	neg	pos	pos	pos
	Resistant
	Intermediately susceptible
	Susceptible

## Sheet: Sheet3
UAEU NO.	CAZ	CAZ/Avi	CTX	AZT	GM	AK	CIP	MEM	COL	Azithro	Phe-Arg	Piperazine	Nona
EC122	128	0.5	≥128	≥128	4	8	64	≤0.5	≤0.5	64	≥128	≥128	≥128
EC123	8	≤0.25	2	1	2	2	0.25	≤0.5	≤0.5	32	≥128	≥128	≥128
EC125	8	≤0.25	≥128	32	128	2	0.25	≤0.5	≤0.5	32	≥128	≥128	≥128
EC13	4	≤0.25	≥128	16	16	4	1	≤0.5	≤0.5	32	≥128	≥128	≥128
EC132	32	≤0.25	≥128	128	2	4	≥64	≤0.5	≤0.5	≥128	≥128	≥128	≥128
EC133	8	≤0.25	2	2	2	4	16	≤0.5	≤0.5	32	≥128	≥128	≥128
EC134	128	0.5	≥128	≥128	2	16	≥64	≤0.5	≤0.5	4	≥128	≥128	≥128
EC14	64	0.5	≥128	≥128	32	8	≥64	≤0.5	≤0.5	32	≥128	≥128	128
EC15	64	≤0.25	≥128	≥128	2	4	0.5	≤0.5	≤0.5	128	≥128	≥128	≥128
EC151	8	≤0.25	≥128	64	32	8	16	≤0.5	≤0.5	4	≥128	≥128	≥128
EC161	128	≤0.25	≥128	≥128	4	8	≥64	≤0.5	≤0.5	4	≥128	≥128	≥128
EC162	32	≤0.25	≥128	128	2	4	2	≤0.5	≤0.5	≥128	≥128	≥128	≥128
EC163	32	≤0.25	≥128	128	1	2	0.25	≤0.5	≤0.5	64	≥128	≥128	≥128
EC169	2	≤0.25	≥128	16	2	4	64	≤0.5	≤0.5	4	≥128	≥128	≥128
EC24	32	≤0.25	≥128	128	≥128	≥128	0.5	≤0.5	≤0.5	4	≥128	≥128	≥128
EC256	32	≤0.25	≥128	64	64	8	64	≤0.5	≤0.5	4	≥128	≥128	≥128
EC26	64	≤0.25	≥128	≥128	2	4	16	≤0.5	≤0.5	128	≥128	≥128	≥128
EC261	128	≤0.25	≥128	128	2	4	0.25	≤0.5	≤0.5	32	≥128	≥128	≥128
EC262	32	≤0.25	≥128	128	1	2	0.5	≤0.5	≤0.5	8	≥128	≥128	≥128
EC316	32	≤0.25	≥128	64	64	2	0.25	≤0.5	≤0.5	8	≥128	≥128	≥128
EC325	16	≤0.25	128	32	2	4	64	≤0.5	≤0.5	64	≥128	≥128	≥128
EC326	32	≤0.25	128	32	2	4	64	≤0.5	≤0.5	64	≥128	≥128	≥128
EC327	32	≤0.25	≥128	128	2	4	32	≤0.5	≤0.5	4	≥128	≥128	≥128
EC404	128	≤0.25	64	≥128	2	8	2	≤0.5	≤0.5	4	≥128	≥128	≥128
EC405	128	≤0.25	≥128	≥128	2	2	0.25	≤0.5	≤0.5	≥128	≥128	≥128	≥128
EC413	64	≤0.25	≥128	≥128	2	8	≥64	≤0.5	≤0.5	≥128	≥128	≥128	≥128
EC414	64	≤0.25	32	≥128	2	4	2	≤0.5	≤0.5	4	≥128	≥128	≥128
EC415	32	≤0.25	≥128	128	2	4	0.25	≤0.5	≤0.5	≥128	≥128	≥128	≥128
EC448	64	≤0.25	≥128	128	2	4	16	≤0.5	≤0.5	2	≥128	≥128	128
EC456	128	≤0.25	32	128	2	2	≥64	≤0.5	≤0.5	≥128	≥128	≥128	128
EC457	128	≤0.25	≥128	≥128	64	8	64	≤0.5	≤0.5	8	≥128	≥128	128
EC463	64	≤0.25	32	128	1	4	0.25	≤0.5	≤0.5	32	≥128	≥128	≥128
EC465	64	≤0.25	32	32	2	4	0.25	≤0.5	≤0.5	32	≥128	≥128	≥128
EC466	64	≤0.25	≥128	128	64	4	64	≤0.5	≤0.5	8	≥128	≥128	≥128
EC468	4	≤0.25	128	16	2	2	0.5	≤0.5	≤0.5	8	≥128	≥128	≥128
EC469	128	≤0.25	≥128	≥128	2	8	32	≤0.5	≤0.5	≥128	≥128	≥128	≥128
EC5	32	≤0.25	≥128	128	2	8	64	≤0.5	≤0.5	4	≥128	≥128	≥128
EC54	≥128	≥128	≥128	≥128	1	2	32	8	≤0.5	32	≥128	≥128	≥128
EC55	8	≤0.25	8	2	2	4	0.25	≤0.5	≤0.5	64	≥128	≥128	≥128
EC56	16	≤0.25	≥128	64	2	4	32	≤0.5	≤0.5	32	≥128	≥128	≥128
EC65	32	0.5	≥128	128	2	4	0.25	≤0.5	≤0.5	32	≥128	≥128	≥128
EC86	16	≤0.25	≥128	32	2	4	64	≤0.5	≤0.5	32	≥128	≥128	≥128
EC90	8	≤0.25	≥128	32	1	2	64	≤0.5	≤0.5	4	≥128	≥128	≥128
EC92	64	0.5	≥128	≥128	64	8	≥64	≤0.5	≤0.5	32	≥128	≥128	≥128
