# Supplementary material for: Boosting the Antibacterial Activity of Azithromycin on Multidrug-Resistant Escherichia coli by Efflux Pump Inhibition Coupled with Outer Membrane Permeabilization Induced by Phenylalanine-Arginine β-Naphthylamide
Source: Int J Mol Sci. 2023 May 12;24(10):8662. doi: 10.3390/ijms24108662 (PMC10218020; doi:10.3390/ijms24108662)
Supplement: Supplementary file 1 [file ijms-24-08662-s001.zip › Table S2.xlsx]

## Sheet: FICI
Table S2. The fractional inhibitory concentration index (FICI) for tested bacteria
Strain ID	AZT MIC (µg/ml)	PAβN MIC (µg/ml)	FICI	ermB	mphA
EC499	>128	>128	0.125	neg	pos
EC26	128	>128	0.1875	neg	pos
EC15	64	>128	0.125	neg	pos
EC477	64	>128	0.09375	neg	pos
EC122	64	>128	0.1875	neg	pos
EC55	32	>128	0.3125	neg	pos
EC133	32	>128	0.1875	neg	pos
EC13	32	>128	0.25	neg	pos
EC14	32	>128	0.125	neg	pos
EC125	32	>128	0.1875	neg	pos
BAA-2469	32	>128	0.1875	neg	pos
CDC-0346	32	>128	0.1875	neg	pos
EC54	32	>128	0.5625	neg	pos
EC501	16	32	0.1875	neg	pos
EC520	8	>128	0.125	neg	neg
EC543	8	>128	0.1875	neg	neg
EC1	8	>128	0.125	neg	neg
EC2	8	>128	0.1875	neg	neg
EC17	8	>128	0.1875	neg	neg
EC24	4	>128	0.3125	neg	neg
ATCC25922	4	>128	0.1875	neg	neg
EC162	>128	>128	none	pos	pos
EC405	>128	>128	none	pos	pos
EC415	>128	>128	none	pos	pos
EC456	>128	>128	none	pos	pos
EC469	>128	>128	none	pos	pos
EC413	>128	>128	none	pos	pos
EC522	>128	>128	none	pos	pos
EC500	>128	>128	none	pos	pos
